# Supplementary material for: Subtelomeric CTCF and cohesin binding site organization using improved subtelomere assemblies and a novel annotation pipeline
Source: HighWire-hosted journal article supplement (doi:10.1101/gr.166983.113), 2014-03-27
Supplement: Supp_Table_7.xlsx [file Supp_Table_7.xlsx]

## Sheet: Sheet1
Track Name	Description	Geo Sample Accession	Geo Series Accession	Encode Accession	ChIP Antibody (Vendor)	Control Type	Control ID	Geo Control Accession	Replicate	N_all map reads	N_uniq map reads	N_all Peaks	N_uniq Peaks	FRiP_all	FRiP_uniq	PBC_all	PBC_uniq	NSC	RSC
H1-hESC_CTCF_Be	CTCF (MIL 07-729) in H1-hESC from Bernstein - Broad Institute	GSM733672	GSE29611	wgEncodeEH000085	CTCF (MIL 07-729)	Input	wgEncodeEH000088	GSM936083	1	15851103	13586947	29411	31331	0.11091	0.128461	0.792322	0.82554	1.85662	2.1323
									2	16060315	14235737			0.221367	0.248299	0.847472	0.87404	3.96404	3.00766
H1-hESC_CTCF_My	CTCF (sc-5916) in H1-hESC from Myers - Hudson Alpha	GSM803419	GSE32465	wgEncodeEH001649	CTCF (sc-5916)	Input	SL1398	GSM803339	1	25876122	22721677	11364	12756	0.131164	0.143718	0.665076	0.696451	3.34937	2.22521
									2	65172934	55755978			0.0341287	0.0377664	0.646686	0.775637	1.19228	1.84345
H1-hESC_POLR2A_My	POLR2A (MMS-126R) in H1-hESC from Myers - Hudson Alpha	GSM803366	GSE32465	wgEncodeEH001499	POLR2A (ab817)	Input	SL969	GSM803364	1	31534450	27872421	12580	13375	0.113365	0.126311	0.750509	0.796231	1.43072	1.25693
									2	31402405	26698625			0.114081	0.126257	0.845857	0.926138	1.55165	1.0544
H1-hESC_RAD21_My	RAD21 in H1-hESC from from Myers - Hudson Alpha	GSM803466	GSE32465	wgEncodeEH001593	RAD21 (ab992)	Input	SL1398	GSM803339	1	17540383	15776285	33795	33426	0.295821	0.317661	0.865288	0.87685	5.66294	2.76588
									2	52928209	47013518			0.266327	0.288804	0.619232	0.656863	3.01109	2.33951
H1-hESC_RAD21_Sn	RAD21 in H1-hESC from fromSnyder - Stanford	GSM935379	GSE31477	wgEncodeEH001836	RAD21 (ab992)	Input	wgEncodeEH001834	GSM935381	1	21218300	18580138	24157	24837	0.118565	0.106	0.891472	0.947592	1.84864	1.72762
									2	27549175	24302053			0.184478	0.16594	0.86322	0.910859	2.83007	2.14143
HMEC_CTCF_Be	CTCF in HMEC from Bernstein - Broad Institute	GSM733724	GSE29611	wgEncodeEH000075	CTCF (MIL 07-729)	Input	wgEncodeEH000093	GSM733668	1	14475692	12548952	15163	17756	0.0338264	0.0429062	0.824646	0.842865	1.22013	0.855519
									2	6870599	6088070			0.118706	0.150469	0.872345	0.880795	3.27217	2.214
IMR90_CTCF_Sn	CTCF_(SC-15914) in IMR90 from Snyder - Stanford	GSM935404	GSE31477	wgEncodeEH002831	CTCF_(SC-15914)	IGG	wgEncodeEH002808	GSM935512	1	23323899	20539667	25349	24966	0.14569	0.155035	0.844717	0.886045	2.23366	2.22168
									2	22532598	19964096			0.268736	0.2842	0.851742	0.866985	4.50456	2.57653
IMR90_POLR2A_Sn	POLR2A in IMR90 from Snyder - Stanford	GSM935513	GSE31477	wgEncodeEH002809	POLR2A (ab817)	IGG	wgEncodeEH002808	GSM935512	1	27476911	24152019	5638	5971	0.0857915	0.0858627	0.847896	0.898696	1.45637	1.07173
									2	26410292	23160221			0.0510877	0.0532782	0.826212	0.883228	1.25177	1.00044
IMR90_RAD21_Sn	RAD21 in IMR90 from Snyder - Stanford	GSM935624	GSE31477	wgEncodeEH002810	RAD21 (ab992)	IGG	wgEncodeEH002808	GSM935512	1	26299908	23389237	16454	16520	0.129143	0.142077	0.875652	0.918606	2.41984	1.81379
									2	29578197	26082923			0.082951	0.0920342	0.85462	0.914275	1.73	1.95036
LCL_CTCF_Iy	Combined CTCF in multiple LCL from Iyer - UT Austin	NA	GSE19622	NA	CTCF	IGG	NA	GSE19484	All	176239270	154146069	25920	25630	0.30514	0.32712	0.632479	0.806489	1.46737	2.25331
LCL_RAD21_My	RAD21 in GM12878 from from Myers - Hudson Alpha	GSM803416	GSE32465	wgEncodeEH001640	RAD21 (ab992)	Input	SL1613	GSM803436	All	39349283	35166592	21772	21614	0.17595	0.191578	0.640005	0.665695	2.5576	2.01594
LCL_SMC1_Li	Deng et. al, 2012	GSM941711	GSE38411	NA	SMC1 (BL A300-055A-3)	IGG	NA	NA	1	26325015	22617520	12319	12551	0.134293	0.145586	0.735336	0.84026	2.07969	1.84433
LCL_CTCF_W_Li	Deng et. al, 2012	GSM941710	GSE38411	NA	CTCF (MIL 07-729)	IGG	NA	NA	2	25267487	21521477	22667	22409	0.378308	0.384359	0.730099	0.771655	5.03875	2.24236
LCL_POLR2A_Sn	Combined POLR2A in multiple LCL from Snyder - Stanford	NA	GSE19484	NA	POLR2A (ab817)	IGG	NA	GSE19484	All	320857756	277548701	13566	13628	0.151951	0.161501	0.641476	0.819727	1.12481	1.20943
BJ_TERF1_m_Gi	TERF1 monoclonal in BJ-HELTRasmc tumor cell line from Gilson	GSM638201	GSE26005	NA	TERF1m (Gilson)	Protein G	GSM638204	GSM638204	1	7531989	6758690	78	75	0.0191556	0.00806118	0.816611	0.826883	1.07483	0.160642
BJ_TERF2_m_Gi	TERF2 monoclonal in BJ-HELTRasmc tumor cell line	GSM638202	GSE26006	NA	TERF2m (Gilson)	Protein G	GSM638204	GSM638204	1	6811045	6141071	83	92	0.0153667	0.00695139	0.854145	0.867451	1.07654	0.162175
BJ_TERF2_p_Gi	TERF2 polyclonal in BJ-HELTRasmc tumor cell line	GSM638203	GSE26007	NA	TERF2p (Gilson)	Protein G	GSM638204	GSM638204	1	7307554	6613326	91	102	0.0175953	0.00765969	0.845574	0.860066	1.07322	0.166568
LCL_TERF1_Li	TERF1 in LCL from Lieberman	GSM1328844	GSE55053	NA	TERF1rp (Lieberman)	IGG	GSM1328846	GSM1328846	1	49216988	44626493	439	126	0.019387	0.00498179	0.684734	0.713925	1.15891	0.377953
LCL_TERF2_Li	TERF2 in LCL from Lieberman	GSM1328845	GSE55053	NA	TERF2rp (Lieberman)	IGG	GSM1328847	GSM1328847	1	40408351	36491598	365	106	0.020097	0.00491489	0.560517	0.556924	1.11777	1.73019
HRE_CTCF_St	CTCF (MIL 07-729) in HRE from Stamatoyannopoulous - UW	GSM749727	GSE30263	wgEncodeEH000405	CTCF (MIL 07-729)	Input	wgEncodeEH000467	GSM749778	1	10338550	9251653	33175	33016	0.294645	0.317061	0.630356	0.650835	5.00652	2.44604
		GSM749737	GSE30263						2	18548666	16515085			0.248981	0.26931	0.376488	0.404469	3.86582	2.25775
SAEC_CTCF_St	CTCF (MIL 07-729) in SAEC from Stamatoyannopoulous - UW	GSM749684	GSE30263	wgEncodeEH000437	CTCF (MIL 07-729)	Input	wgEncodeEH000473	GSM749682	1	11921656	10681395	32291	31587	0.386236	0.40935	0.515041	0.513657	8.48964	1.78586
		GSM749779	GSE30263						2	13792241	12407536			0.387487	0.410489	0.660626	0.646004	7.68766	1.95785
WERI-RB-1_CTCF_St	CTCF (MIL 07-729) in WERI-RB-1 from Stamatoyannopoulous - UW	GSM749768	GSE30263	wgEncodeEH000402	CTCF (MIL 07-729)	Input	wgEncodeEH000475	GSM749766	1	14555668	12840700	27318	27668	0.276243	0.298158	0.86348	0.877006	5.2081	1.4922
		GSM749679	GSE30263						2	18317566	15708781			0.151593	0.167574	0.849939	0.895327	2.3639	1.48082
MCF-7_CTCF_St	CTCF (MIL 07-729) in MCF-7 from Stamatoyannopoulous - UW	GSM1022658	GSE30263	wgEncodeEH002057	CTCF (MIL 07-729)	Input	wgEncodeEH000968	GSM749760	1	25334406	22075333	22955	24262	0.128287	0.143788	0.861477	0.92026	2.07895	2.05269
		GSM1022663	GSE30263						2	23955957	20896942			0.0875871	0.0973664	0.86476	0.928282	1.54419	1.84588
A549_CTCF_St	CTCF (MIL 07-729) in A549 from Stamatoyannopoulous - UW	GSM1022640	GSE30263	wgEncodeEH001890	CTCF (MIL 07-729)	Input	wgEncodeEH001904	GSM1022674	1	12491428	10811875	29738	29849	0.172892	0.1907	0.39301	0.470259	2.42712	1.59777
		GSM1022639	GSE30263						2	18068399	15700508			0.212724	0.232241	0.727246	0.763299	2.93881	2.1399
HMEC_CTCF_St	CTCF (MIL 07-729) in HMEC from Stamatoyannopoulous - UW	GSM749753	GSE30263	wgEncodeEH000419	CTCF (MIL 07-729)	Input	wgEncodeEH000466	GSM749755	1	20089452	17901216	31375	31046	0.336403	0.360685	0.854676	0.855458	5.85024	1.60032
		GSM1022631	GSE30263						2	17218342	15264433			0.184803	0.202501	0.849733	0.88236	2.76534	2.26316
HRPEpic_CTCF_St	CTCF (MIL 07-729) in HRPEpic from Stamatoyannopoulous - UW	GSM749673	GSE30263	wgEncodeEH000988	CTCF (MIL 07-729)	Input	wgEncodeEH000962	GSM749771	1	29611611	26006533	26176	26461	0.165024	0.182593	0.850869	0.898719	2.54129	1.72503
		GSM1022665	GSE30263						2	17510652	15370429			0.150988	0.167483	0.86736	0.907741	2.53659	2.2832
HEK293_CTCF_St	CTCF (MIL 07-729) in HEK293 from Stamatoyannopoulous - UW	GSM749668	GSE30263	wgEncodeEH000396	CTCF (MIL 07-729)	Input	wgEncodeEH000464	GSM749771	1	17295242	15053831	30430	30423	0.335505	0.360142	0.807163	0.811176	5.35523	1.49232
		GSM749687	GSE30263						2	8597881	7421429			0.22223	0.240473	0.833732	0.832459	3.46098	1.53413
