# Supplementary material for: Subtelomeric CTCF and cohesin binding site organization using improved subtelomere assemblies and a novel annotation pipeline
Source: HighWire-hosted journal article supplement (doi:10.1101/gr.166983.113), 2014-03-27
Supplement: Supplemental_Table.xlsx [file Supplemental_Table.xlsx]

## Sheet: 1kb
Raw counts
	1 Copy/SRE	Gap	SRE/SRE	SRE/SD	Terminal	All_SRE	ITS	Total Peaks
LCL_CTCF_Iy	3	1	22	0	11	34	6	95
LCL_CTCF_W_Li	4	1	27	0	15	39	8	101
H1-hESC_CTCF_Be	3	1	18	0	12	29	6	74
H1-hESC_CTCF_My	3	1	19	0	13	30	4	62
IMR90_CTCF_Sn	2	1	21	0	8	31	6	99
HMEC_CTCF_Be	0	1	10	0	5	19	4	49
LCL_RAD21_My	2	1	14	0	4	24	6	68
LCL_SMC1_Li	2	1	22	0	11	33	4	69
H1-hESC_RAD21_My	2	1	27	0	7	36	8	103
H1-hESC_RAD21_Sn	2	1	21	0	4	30	5	56
IMR90_RAD21_Sn	1	1	12	0	2	18	3	38
LCL_CTCF_Iy & LCL_RAD21_My	2	1	15	0	6	25	8	48
LCL_CTCF_W_Li & LCL_SMC1_Li	2	1	23	0	15	34	6	66
H1-hESC_CTCF_Be & H1-hESC_RAD21_My	3	1	18	0	11	28	6	67
H1-hESC_CTCF_My & H1-hESC_RAD21_Sn	2	1	15	0	7	24	4	43
IMR90_CTCF_Sn & IMR90_RAD21_Sn	1	1	12	0	3	18	3	38
Tel Repeat	8	1	45	1	0	48	71	71
Sequence	102051	8852	696117	27574	30060	814506	128357	3645865
Percent
	1 Copy/SRE	Gap	SRE/SRE	SRE/SD	Terminal	All_SRE	ITS	Total Peaks
LCL_CTCF_Iy	0.0315789	0.0105263	0.231579	0	0.115789	0.357895	0.0631579	1
LCL_CTCF_W_Li	0.039604	0.00990099	0.267327	0	0.148515	0.386139	0.0792079	1
H1-hESC_CTCF_Be	0.0405405	0.0135135	0.243243	0	0.162162	0.391892	0.0810811	1
H1-hESC_CTCF_My	0.0483871	0.016129	0.306452	0	0.209677	0.483871	0.0645161	1
IMR90_CTCF_Sn	0.020202	0.010101	0.212121	0	0.0808081	0.313131	0.0606061	1
HMEC_CTCF_Be	0	0.0204082	0.204082	0	0.102041	0.387755	0.0816327	1
LCL_RAD21_My	0.0294118	0.0147059	0.205882	0	0.0588235	0.352941	0.0882353	1
LCL_SMC1_Li	0.0289855	0.0144928	0.318841	0	0.15942	0.478261	0.057971	1
H1-hESC_RAD21_My	0.0194175	0.00970874	0.262136	0	0.0679612	0.349515	0.0776699	1
H1-hESC_RAD21_Sn	0.0357143	0.0178571	0.375	0	0.0714286	0.535714	0.0892857	1
IMR90_RAD21_Sn	0.0263158	0.0263158	0.315789	0	0.0526316	0.473684	0.0789474	1
LCL_CTCF_Iy & LCL_RAD21_My	0.0416667	0.0208333	0.3125	0	0.125	0.520833	0.166667	1
LCL_CTCF_W_Li & LCL_SMC1_Li	0.030303	0.0151515	0.348485	0	0.227273	0.515152	0.0909091	1
H1-hESC_CTCF_Be & H1-hESC_RAD21_My	0.0447761	0.0149254	0.268657	0	0.164179	0.41791	0.0895522	1
H1-hESC_CTCF_My & H1-hESC_RAD21_Sn	0.0465116	0.0232558	0.348837	0	0.162791	0.55814	0.0930233	1
IMR90_CTCF_Sn & IMR90_RAD21_Sn	0.0263158	0.0263158	0.315789	0	0.0789474	0.473684	0.0789474	1
Tel Repeat	0.112676	0.0140845	0.633803	0.0140845	0	0.676056	1	1
Expected	0.0279909	0.00242796	0.190933	0.00756309	0.00824496	0.223405	0.0352062	1
Enrichment
	1 Copy/SRE	Gap	SRE/SRE	SRE/SD	Terminal	All_SRE	ITS	Total Peaks
LCL_CTCF_Iy	1.12819	4.33546	1.21288	0	14.0437	1.602	1.79394	1
LCL_CTCF_W_Li	1.41489	4.07791	1.40011	0	18.0128	1.72842	2.24983	1
H1-hESC_CTCF_Be	1.44835	5.5658	1.27397	0	19.668	1.75417	2.30304	1
H1-hESC_CTCF_My	1.72867	6.64305	1.60502	0	25.431	2.16589	1.83252	1
IMR90_CTCF_Sn	0.721736	4.16029	1.11097	0	9.80091	1.40163	1.72146	1
HMEC_CTCF_Be	0	8.40549	1.06886	0	12.3761	1.73566	2.3187	1
LCL_RAD21_My	1.05076	6.0569	1.07829	0	7.13449	1.57982	2.50624	1
LCL_SMC1_Li	1.03553	5.96912	1.66991	0	19.3355	2.14078	1.64661	1
H1-hESC_RAD21_My	0.693707	3.99873	1.37292	0	8.24276	1.56449	2.20614	1
H1-hESC_RAD21_Sn	1.27593	7.3548	1.96404	0	8.6633	2.39795	2.53608	1
IMR90_RAD21_Sn	0.940156	10.8387	1.65393	0	6.38349	2.12029	2.24243	1
LCL_CTCF_Iy & LCL_RAD21_My	1.48858	8.58061	1.6367	0	15.1608	2.33134	4.73402	1
LCL_CTCF_W_Li & LCL_SMC1_Li	1.0826	6.24044	1.82517	0	27.5651	2.3059	2.58219	1
H1-hESC_CTCF_Be & H1-hESC_RAD21_My	1.59967	6.1473	1.40707	0	19.9127	1.87064	2.54365	1
H1-hESC_CTCF_My & H1-hESC_RAD21_Sn	1.66167	9.57835	1.82701	0	19.7443	2.49833	2.64224	1
IMR90_CTCF_Sn & IMR90_RAD21_Sn	0.940156	10.8387	1.65393	0	9.57523	2.12029	2.24243	1
Tel Repeat	4.02545	5.80097	3.3195	1.86227	0	3.02614	28.4041	1
P values
	1 Copy/SRE	Gap	SRE/SRE	SRE/SD	Terminal	All_SRE	ITS
LCL_CTCF_Iy	0.498628	0.20621	0.188315	1	4.94879e-10	0.0019766	0.07608
LCL_CTCF_W_Li	0.313526	0.217704	0.0378352	1	8.51885e-15	0.000166012	0.0109684
H1-hESC_CTCF_Be	0.342879	0.164636	0.159004	1	1.34943e-12	0.000815725	0.0217856
H1-hESC_CTCF_My	0.251134	0.139908	0.0197341	1	4.61687e-15	5.77781e-06	0.0934602
IMR90_CTCF_Sn	0.7683	0.213891	0.333523	1	1.87741e-06	0.0246485	0.102136
HMEC_CTCF_Be	1	0.112294	0.464079	1	5.37146e-05	0.00697272	0.0685044
LCL_RAD21_My	0.57085	0.152362	0.424522	1	0.00247342	0.0102143	0.0250573
LCL_SMC1_Li	0.578802	0.15442	0.00779821	1	1.40685e-11	2.78419e-06	0.147316
H1-hESC_RAD21_My	0.786987	0.221498	0.0472977	1	2.57119e-05	0.00237773	0.0202136
H1-hESC_RAD21_Sn	0.467136	0.127272	0.00100513	1	0.00120613	3.61052e-07	0.0357675
IMR90_RAD21_Sn	0.660005	0.0882364	0.045884	1	0.0392839	0.000579888	0.132425
LCL_CTCF_Iy & LCL_RAD21_My	0.390233	0.110133	0.0302116	1	2.86461e-06	6.55344e-06	9.52414e-05
LCL_CTCF_W_Li & LCL_SMC1_Li	0.554621	0.148231	0.00187247	1	9.73152e-18	2.14037e-07	0.0088268
H1-hESC_CTCF_Be & H1-hESC_RAD21_My	0.289141	0.150299	0.0757901	1	1.00639e-11	0.000291176	0.0137271
H1-hESC_CTCF_My & H1-hESC_RAD21_Sn	0.339707	0.0992514	0.0107885	1	6.43473e-08	1.99357e-06	0.0369487
IMR90_CTCF_Sn & IMR90_RAD21_Sn	0.660005	0.0882364	0.045884	1	0.00381147	0.000579888	0.124468
Tel Repeat	0.000834034	0.158521	3.1153e-16	0.41668	1	4.51054e-16

## Sheet: 1.5kb
Raw counts
	1 Copy/SRE	Gap	SRE/SRE	SRE/SD	Terminal	All_SRE	ITS	Total Peaks
LCL_CTCF_Iy	5	1	27	0	22	42	10	96
LCL_CTCF_W_Li	5	1	34	0	23	48	10	102
H1-hESC_CTCF_Be	3	1	23	0	21	35	10	74
H1-hESC_CTCF_My	3	1	24	0	21	36	8	62
IMR90_CTCF_Sn	2	1	27	0	19	37	8	99
HMEC_CTCF_Be	0	1	13	0	18	22	7	49
LCL_RAD21_My	3	1	20	0	7	31	8	69
LCL_SMC1_Li	2	1	27	0	23	38	8	69
H1-hESC_RAD21_My	2	1	35	0	21	44	10	103
H1-hESC_RAD21_Sn	2	1	25	0	8	34	7	56
IMR90_RAD21_Sn	1	1	14	0	4	20	3	38
LCL_CTCF_Iy & LCL_RAD21_My	3	1	21	0	7	32	8	49
LCL_CTCF_W_Li & LCL_SMC1_Li	2	1	27	0	23	39	8	66
H1-hESC_CTCF_Be & H1-hESC_RAD21_My	2	1	19	0	8	29	8	43
H1-hESC_CTCF_My & H1-hESC_RAD21_Sn	2	1	23	0	20	33	6	54
IMR90_CTCF_Sn & IMR90_RAD21_Sn	1	1	14	0	4	20	3	38
Tel Repeat	8	1	46	1	0	49	71	71
Sequence	152286	12576	926388	39574	45060	1095736	176409	3678865
Percent
	1 Copy/SRE	Gap	SRE/SRE	SRE/SD	Terminal	All_SRE	ITS	Total Peaks
LCL_CTCF_Iy	0.0520833	0.0104167	0.28125	0	0.229167	0.4375	0.104167	1
LCL_CTCF_W_Li	0.0490196	0.00980392	0.333333	0	0.22549	0.470588	0.0980392	1
H1-hESC_CTCF_Be	0.0405405	0.0135135	0.310811	0	0.283784	0.472973	0.135135	1
H1-hESC_CTCF_My	0.0483871	0.016129	0.387097	0	0.33871	0.580645	0.129032	1
IMR90_CTCF_Sn	0.020202	0.010101	0.272727	0	0.191919	0.373737	0.0808081	1
HMEC_CTCF_Be	0	0.0204082	0.265306	0	0.367347	0.44898	0.142857	1
LCL_RAD21_My	0.0434783	0.0144928	0.289855	0	0.101449	0.449275	0.115942	1
LCL_SMC1_Li	0.0289855	0.0144928	0.391304	0	0.333333	0.550725	0.115942	1
H1-hESC_RAD21_My	0.0194175	0.00970874	0.339806	0	0.203883	0.427184	0.0970874	1
H1-hESC_RAD21_Sn	0.0357143	0.0178571	0.446429	0	0.142857	0.607143	0.125	1
IMR90_RAD21_Sn	0.0263158	0.0263158	0.368421	0	0.105263	0.526316	0.0789474	1
LCL_CTCF_Iy & LCL_RAD21_My	0.0612245	0.0204082	0.428571	0	0.142857	0.653061	0.163265	1
LCL_CTCF_W_Li & LCL_SMC1_Li	0.030303	0.0151515	0.409091	0	0.348485	0.590909	0.121212	1
H1-hESC_CTCF_Be & H1-hESC_RAD21_My	0.0465116	0.0232558	0.44186	0	0.186047	0.674419	0.186047	1
H1-hESC_CTCF_My & H1-hESC_RAD21_Sn	0.037037	0.0185185	0.425926	0	0.37037	0.611111	0.111111	1
IMR90_CTCF_Sn & IMR90_RAD21_Sn	0.0263158	0.0263158	0.368421	0	0.105263	0.526316	0.0789474	1
Tel Repeat	0.112676	0.0140845	0.647887	0.0140845	0	0.690141	1	1
Expected	0.0413948	0.00341845	0.251814	0.0107571	0.0122483	0.297846	0.047952	1
Enrichment
	1 Copy/SRE	Gap	SRE/SRE	SRE/SD	Terminal	All_SRE	ITS	Total Peaks
LCL_CTCF_Iy	1.25821	3.04719	1.1169	0	18.71	1.46888	2.17231	1
LCL_CTCF_W_Li	1.1842	2.86795	1.32373	0	18.4099	1.57997	2.04453	1
H1-hESC_CTCF_Be	0.979362	3.95312	1.23429	0	23.1692	1.58798	2.81813	1
H1-hESC_CTCF_My	1.16892	4.71824	1.53724	0	27.6535	1.94948	2.69086	1
IMR90_CTCF_Sn	0.488032	2.95485	1.08305	0	15.669	1.2548	1.68519	1
HMEC_CTCF_Be	0	5.97001	1.05358	0	29.9916	1.50742	2.97917	1
LCL_RAD21_My	1.05033	4.23957	1.15107	0	8.28269	1.50841	2.41788	1
LCL_SMC1_Li	0.70022	4.23957	1.55394	0	27.2146	1.84902	2.41788	1
H1-hESC_RAD21_My	0.46908	2.8401	1.34943	0	16.6458	1.43425	2.02468	1
H1-hESC_RAD21_Sn	0.862772	5.22376	1.77285	0	11.6634	2.03844	2.60677	1
IMR90_RAD21_Sn	0.635726	7.69817	1.46307	0	8.59407	1.76707	1.64638	1
LCL_CTCF_Iy & LCL_RAD21_My	1.47904	5.97001	1.70194	0	11.6634	2.19261	3.40476	1
LCL_CTCF_W_Li & LCL_SMC1_Li	0.732049	4.43228	1.62458	0	28.4516	1.98394	2.52778	1
H1-hESC_CTCF_Be & H1-hESC_RAD21_My	1.12361	6.80304	1.75471	0	15.1895	2.26432	3.87985	1
H1-hESC_CTCF_My & H1-hESC_RAD21_Sn	0.894726	5.41723	1.69143	0	30.2384	2.05177	2.31713	1
IMR90_CTCF_Sn & IMR90_RAD21_Sn	0.635726	7.69817	1.46307	0	8.59407	1.76707	1.64638	1
Tel Repeat	2.72198	4.12015	2.57289	1.30932	0	2.3171	20.8542	1
P values
	1 Copy/SRE	Gap	SRE/SRE	SRE/SD	Terminal	All_SRE	ITS
LCL_CTCF_Iy	0.365927	0.280165	0.28765	1	9.28303e-22	0.00258304	0.00277296
LCL_CTCF_W_Li	0.415395	0.294803	0.0402166	1	1.66627e-22	0.000176714	0.00448157
H1-hESC_CTCF_Be	0.595757	0.223841	0.150414	1	5.57491e-23	0.0011218	0.000187561
H1-hESC_CTCF_My	0.476149	0.191283	0.0129726	1	7.85789e-25	3.48219e-06	0.000643456
IMR90_CTCF_Sn	0.919728	0.287522	0.351968	1	1.8857e-17	0.0637508	0.0379535
HMEC_CTCF_Be	1	0.154469	0.467968	1	3.03539e-22	0.0178854	0.000552865
LCL_RAD21_My	0.548093	0.210438	0.272929	1	2.29602e-05	0.00552678	0.00936339
LCL_SMC1_Li	0.784731	0.210438	0.00743263	1	7.24134e-27	1.05619e-05	0.00142025
H1-hESC_RAD21_My	0.929997	0.297214	0.0286909	1	1.04986e-19	0.00359916	0.00584848
H1-hESC_RAD21_Sn	0.679649	0.174496	0.00119971	1	4.26202e-07	1.58147e-06	0.00761079
IMR90_RAD21_Sn	0.799409	0.122013	0.0747107	1	0.00119143	0.00266921	0.222061
LCL_CTCF_Iy & LCL_RAD21_My	0.33112	0.154469	0.00517834	1	2.26313e-06	2.98066e-07	0.000761676
LCL_CTCF_W_Li & LCL_SMC1_Li	0.763577	0.202285	0.00365887	1	2.17704e-27	7.43484e-07	0.000896737
H1-hESC_CTCF_Be & H1-hESC_RAD21_My	0.53613	0.136917	0.00513657	1	5.01201e-08	3.83114e-07	0.000204843
H1-hESC_CTCF_My & H1-hESC_RAD21_Sn	0.660193	0.168823	0.00387141	1	1.22067e-24	1.8251e-06	0.00512735
IMR90_CTCF_Sn & IMR90_RAD21_Sn	0.799409	0.122013	0.0747107	1	0.00119143	0.00266921	0.222061
Tel Repeat	0.0090014	0.215827	2.41438e-12	0.53601	1	1.07207e-11

## Sheet: 2kb
Raw counts
	1 Copy/SRE	Gap	SRE/SRE	SRE/SD	Terminal	All_SRE	ITS	Total Peaks
LCL_CTCF_Iy	5	1	31	0	25	46	12	97
LCL_CTCF_W_Li	5	1	37	0	25	50	12	102
H1-hESC_CTCF_Be	3	1	25	0	23	37	11	74
H1-hESC_CTCF_My	3	1	25	0	23	37	9	62
IMR90_CTCF_Sn	2	1	28	0	20	39	11	99
HMEC_CTCF_Be	0	1	16	0	19	26	10	49
LCL_RAD21_My	3	1	25	0	7	35	9	69
LCL_SMC1_Li	2	1	28	0	24	40	9	69
H1-hESC_RAD21_My	2	1	40	0	21	50	15	103
H1-hESC_RAD21_Sn	2	1	29	0	8	39	10	56
IMR90_RAD21_Sn	1	1	15	0	4	21	3	38
LCL_CTCF_Iy & LCL_RAD21_My	3	1	24	0	7	34	9	49
LCL_CTCF_W_Li & LCL_SMC1_Li	2	1	28	0	25	40	9	66
H1-hESC_CTCF_Be & H1-hESC_RAD21_My	2	1	21	0	8	31	8	43
H1-hESC_CTCF_My & H1-hESC_RAD21_Sn	2	1	24	0	20	34	7	54
IMR90_CTCF_Sn & IMR90_RAD21_Sn	1	1	15	0	4	21	3	38
Tel Repeat	10	1	46	1	0	51	73	73
Sequence	201264	16076	1127479	51574	60060	1343353	224209	3710079
Percent
	1 Copy/SRE	Gap	SRE/SRE	SRE/SD	Terminal	All_SRE	ITS	Total Peaks
LCL_CTCF_Iy	0.0515464	0.0103093	0.319588	0	0.257732	0.474227	0.123711	1
LCL_CTCF_W_Li	0.0490196	0.00980392	0.362745	0	0.245098	0.490196	0.117647	1
H1-hESC_CTCF_Be	0.0405405	0.0135135	0.337838	0	0.310811	0.5	0.148649	1
H1-hESC_CTCF_My	0.0483871	0.016129	0.403226	0	0.370968	0.596774	0.145161	1
IMR90_CTCF_Sn	0.020202	0.010101	0.282828	0	0.20202	0.393939	0.111111	1
HMEC_CTCF_Be	0	0.0204082	0.326531	0	0.387755	0.530612	0.204082	1
LCL_RAD21_My	0.0434783	0.0144928	0.362319	0	0.101449	0.507246	0.130435	1
LCL_SMC1_Li	0.0289855	0.0144928	0.405797	0	0.347826	0.57971	0.130435	1
H1-hESC_RAD21_My	0.0194175	0.00970874	0.38835	0	0.203883	0.485437	0.145631	1
H1-hESC_RAD21_Sn	0.0357143	0.0178571	0.517857	0	0.142857	0.696429	0.178571	1
IMR90_RAD21_Sn	0.0263158	0.0263158	0.394737	0	0.105263	0.552632	0.0789474	1
LCL_CTCF_Iy & LCL_RAD21_My	0.0612245	0.0204082	0.489796	0	0.142857	0.693878	0.183673	1
LCL_CTCF_W_Li & LCL_SMC1_Li	0.030303	0.0151515	0.424242	0	0.378788	0.606061	0.136364	1
H1-hESC_CTCF_Be & H1-hESC_RAD21_My	0.0465116	0.0232558	0.488372	0	0.186047	0.72093	0.186047	1
H1-hESC_CTCF_My & H1-hESC_RAD21_Sn	0.037037	0.0185185	0.444444	0	0.37037	0.62963	0.12963	1
IMR90_CTCF_Sn & IMR90_RAD21_Sn	0.0263158	0.0263158	0.394737	0	0.105263	0.552632	0.0789474	1
Tel Repeat	0.136986	0.0136986	0.630137	0.0136986	0	0.69863	1	1
Expected	0.0542479	0.00433306	0.303896	0.0139011	0.0161883	0.362082	0.0604324	1
Enrichment
	1 Copy/SRE	Gap	SRE/SRE	SRE/SD	Terminal	All_SRE	ITS	Total Peaks
LCL_CTCF_Iy	0.950201	2.37921	1.05163	0	15.9208	1.30972	2.0471	1
LCL_CTCF_W_Li	0.903622	2.26259	1.19365	0	15.1404	1.35383	1.94675	1
H1-hESC_CTCF_Be	0.74732	3.1187	1.11169	0	19.1997	1.3809	2.45975	1
H1-hESC_CTCF_My	0.891963	3.72232	1.32685	0	22.9157	1.64817	2.40204	1
IMR90_CTCF_Sn	0.372402	2.33115	0.930674	0	12.4794	1.08798	1.8386	1
HMEC_CTCF_Be	0	4.70987	1.07448	0	23.9527	1.46545	3.37702	1
LCL_RAD21_My	0.801474	3.34469	1.19225	0	6.26681	1.40092	2.15836	1
LCL_SMC1_Li	0.534316	3.34469	1.33531	0	21.4862	1.60105	2.15836	1
H1-hESC_RAD21_My	0.35794	2.24062	1.2779	0	12.5945	1.34068	2.40982	1
H1-hESC_RAD21_Sn	0.658353	4.12114	1.70406	0	8.8247	1.9234	2.9549	1
IMR90_RAD21_Sn	0.485102	6.07326	1.29892	0	6.50241	1.52626	1.30637	1
LCL_CTCF_Iy & LCL_RAD21_My	1.12861	4.70987	1.61172	0	8.8247	1.91635	3.03932	1
LCL_CTCF_W_Li & LCL_SMC1_Li	0.558603	3.49672	1.39601	0	23.3988	1.67382	2.25647	1
H1-hESC_CTCF_Be & H1-hESC_RAD21_My	0.85739	5.36706	1.60704	0	11.4926	1.99107	3.07859	1
H1-hESC_CTCF_My & H1-hESC_RAD21_Sn	0.682737	4.27377	1.46249	0	22.8788	1.73891	2.14504	1
IMR90_CTCF_Sn & IMR90_RAD21_Sn	0.485102	6.07326	1.29892	0	6.50241	1.52626	1.30637	1
Tel Repeat	2.52519	3.16142	2.07353	0.985438	0	1.92948	16.5474	1
P values
	1 Copy/SRE	Gap	SRE/SRE	SRE/SD	Terminal	All_SRE	ITS
LCL_CTCF_Iy	0.610071	0.343754	0.405485	1	5.31149e-23	0.0152315	0.00121479
LCL_CTCF_W_Li	0.654262	0.35785	0.119033	1	2.06367e-22	0.00539951	0.00219865
H1-hESC_CTCF_Be	0.772123	0.274826	0.301417	1	2.32579e-23	0.0104095	0.000195341
H1-hESC_CTCF_My	0.660588	0.236035	0.0616184	1	2.0466e-25	0.000143822	0.000432322
IMR90_CTCF_Sn	0.973292	0.349429	0.710503	1	1.80439e-16	0.287283	0.00785903
HMEC_CTCF_Be	1	0.191667	0.417387	1	1.09031e-21	0.0117206	6.34033e-06
LCL_RAD21_My	0.729834	0.258908	0.176979	1	0.000130645	0.00950642	0.0118749
LCL_SMC1_Li	0.894337	0.258908	0.046208	1	1.16059e-25	0.000190006	0.0013022
H1-hESC_RAD21_My	0.977899	0.360632	0.0416462	1	2.64496e-17	0.00684755	0.000108694
H1-hESC_RAD21_Sn	0.814633	0.215869	0.000669553	1	3.35168e-06	3.82174e-07	0.000507338
IMR90_RAD21_Sn	0.879901	0.152118	0.149098	1	0.00326795	0.0127504	0.338509
LCL_CTCF_Iy & LCL_RAD21_My	0.500612	0.191667	0.00485368	1	1.37867e-05	2.42997e-06	0.000771879
LCL_CTCF_W_Li & LCL_SMC1_Li	0.879427	0.249191	0.0255319	1	9.12524e-28	4.79841e-05	0.000640575
H1-hESC_CTCF_Be & H1-hESC_RAD21_My	0.685	0.170329	0.00850062	1	4.12479e-07	1.84793e-06	0.000957352
H1-hESC_CTCF_My & H1-hESC_RAD21_Sn	0.798403	0.209029	0.0203038	1	2.8189e-22	5.82462e-05	0.00372191
IMR90_CTCF_Sn & IMR90_RAD21_Sn	0.879901	0.152118	0.149098	1	0.00326795	0.0127504	0.338509
Tel Repeat	0.00596449	0.27167	8.97667e-09	0.640088	1	5.36498e-09	1.07821e-89

## Sheet: 3kb
Raw counts
	1 Copy/SRE	Gap	SRE/SRE	SRE/SD	Terminal	All_SRE	ITS	Total Peaks
LCL_CTCF_Iy	8	1	45	0	25	68	16	97
LCL_CTCF_W_Li	8	1	47	1	25	69	17	102
H1-hESC_CTCF_Be	6	1	34	0	23	54	14	74
H1-hESC_CTCF_My	6	1	34	0	23	54	9	62
IMR90_CTCF_Sn	4	1	37	0	21	57	14	99
HMEC_CTCF_Be	1	1	23	0	20	42	12	49
LCL_RAD21_My	4	1	29	0	7	39	13	69
LCL_SMC1_Li	4	1	37	0	25	57	10	68
H1-hESC_RAD21_My	5	1	52	0	21	71	20	103
H1-hESC_RAD21_Sn	3	1	35	0	8	44	12	56
IMR90_RAD21_Sn	2	1	17	0	4	23	3	38
LCL_CTCF_Iy & LCL_RAD21_My	4	1	28	0	7	38	13	49
LCL_CTCF_W_Li & LCL_SMC1_Li	4	1	37	1	25	58	14	66
H1-hESC_CTCF_Be & H1-hESC_RAD21_My	3	1	26	0	8	35	10	43
H1-hESC_CTCF_My & H1-hESC_RAD21_Sn	5	1	31	0	20	50	7	54
IMR90_CTCF_Sn & IMR90_RAD21_Sn	2	1	17	0	4	23	6	38
Tel Repeat	16	1	46	1	1	55	77	77
Sequence	297264	23076	1457453	75574	90060	1751080	309076	3770157
Percent
	1 Copy/SRE	Gap	SRE/SRE	SRE/SD	Terminal	All_SRE	ITS	Total Peaks
LCL_CTCF_Iy	0.0824742	0.0103093	0.463918	0	0.257732	0.701031	0.164948	1
LCL_CTCF_W_Li	0.0784314	0.00980392	0.460784	0.00980392	0.245098	0.676471	0.166667	1
H1-hESC_CTCF_Be	0.0810811	0.0135135	0.459459	0	0.310811	0.72973	0.189189	1
H1-hESC_CTCF_My	0.0967742	0.016129	0.548387	0	0.370968	0.870968	0.145161	1
IMR90_CTCF_Sn	0.040404	0.010101	0.373737	0	0.212121	0.575758	0.141414	1
HMEC_CTCF_Be	0.0204082	0.0204082	0.469388	0	0.408163	0.857143	0.244898	1
LCL_RAD21_My	0.057971	0.0144928	0.42029	0	0.101449	0.565217	0.188406	1
LCL_SMC1_Li	0.0588235	0.0147059	0.544118	0	0.367647	0.838235	0.147059	1
H1-hESC_RAD21_My	0.0485437	0.00970874	0.504854	0	0.203883	0.68932	0.194175	1
H1-hESC_RAD21_Sn	0.0535714	0.0178571	0.625	0	0.142857	0.785714	0.214286	1
IMR90_RAD21_Sn	0.0526316	0.0263158	0.447368	0	0.105263	0.605263	0.0789474	1
LCL_CTCF_Iy & LCL_RAD21_My	0.0816327	0.0204082	0.571429	0	0.142857	0.77551	0.265306	1
LCL_CTCF_W_Li & LCL_SMC1_Li	0.0606061	0.0151515	0.560606	0.0151515	0.378788	0.878788	0.212121	1
H1-hESC_CTCF_Be & H1-hESC_RAD21_My	0.0697674	0.0232558	0.604651	0	0.186047	0.813953	0.232558	1
H1-hESC_CTCF_My & H1-hESC_RAD21_Sn	0.0925926	0.0185185	0.574074	0	0.37037	0.925926	0.12963	1
IMR90_CTCF_Sn & IMR90_RAD21_Sn	0.0526316	0.0263158	0.447368	0	0.105263	0.605263	0.157895	1
Tel Repeat	0.207792	0.012987	0.597403	0.012987	0.012987	0.714286	1	1
Expected	0.0788466	0.0061207	0.386576	0.0200453	0.0238876	0.464458	0.0819796	1
Enrichment
	1 Copy/SRE	Gap	SRE/SRE	SRE/SD	Terminal	All_SRE	ITS	Total Peaks
LCL_CTCF_Iy	1.04601	1.68433	1.20007	0	10.7894	1.50935	2.01207	1
LCL_CTCF_W_Li	0.994734	1.60176	1.19196	0.489088	10.2605	1.45647	2.03303	1
H1-hESC_CTCF_Be	1.02834	2.20784	1.18854	0	13.0114	1.57114	2.30776	1
H1-hESC_CTCF_My	1.22737	2.63516	1.41857	0	15.5297	1.87523	1.7707	1
IMR90_CTCF_Sn	0.512439	1.6503	0.966788	0	8.87997	1.23963	1.72499	1
HMEC_CTCF_Be	0.258834	3.33429	1.21422	0	17.0868	1.84547	2.9873	1
LCL_RAD21_My	0.735238	2.36783	1.08721	0	4.24694	1.21694	2.2982	1
LCL_SMC1_Li	0.74605	2.40265	1.40753	0	15.3907	1.80476	1.79385	1
H1-hESC_RAD21_My	0.615673	1.58621	1.30596	0	8.53512	1.48414	2.36857	1
H1-hESC_RAD21_Sn	0.679439	2.9175	1.61676	0	5.98039	1.69168	2.61389	1
IMR90_RAD21_Sn	0.667519	4.29947	1.15726	0	4.4066	1.30316	0.963012	1
LCL_CTCF_Iy & LCL_RAD21_My	1.03534	3.33429	1.47818	0	5.98039	1.66971	3.23625	1
LCL_CTCF_W_Li & LCL_SMC1_Li	0.768658	2.47545	1.45018	0.755863	15.8571	1.89207	2.58749	1
H1-hESC_CTCF_Be & H1-hESC_RAD21_My	0.884851	3.79954	1.56412	0	7.78841	1.75248	2.83678	1
H1-hESC_CTCF_My & H1-hESC_RAD21_Sn	1.17434	3.02556	1.48502	0	15.5047	1.99356	1.58124	1
IMR90_CTCF_Sn & IMR90_RAD21_Sn	0.667519	4.29947	1.15726	0	4.4066	1.30316	1.92602	1
Tel Repeat	2.6354	2.12182	1.54537	0.647883	0.543672	1.53789	12.1982	1
P values
	1 Copy/SRE	Gap	SRE/SRE	SRE/SD	Terminal	All_SRE	ITS
LCL_CTCF_Iy	0.500796	0.448731	0.0731471	1	5.05593e-19	2.09003e-06	0.000199507
LCL_CTCF_W_Li	0.558911	0.465396	0.0762587	0.873232	1.8887e-18	1.26063e-05	0.000139154
H1-hESC_CTCF_Be	0.533076	0.365123	0.121906	1	1.19914e-19	3.31167e-06	4.30711e-05
H1-hESC_CTCF_My	0.363561	0.316583	0.00707443	1	1.15952e-21	2.70315e-11	0.00366826
IMR90_CTCF_Sn	0.957796	0.455459	0.639991	1	2.33908e-14	0.0171053	0.00419184
HMEC_CTCF_Be	0.982124	0.259801	0.148456	1	5.13318e-20	1.29306e-08	1.26216e-06
LCL_RAD21_My	0.803024	0.345331	0.323289	1	0.00131165	0.059844	0.00136006
LCL_SMC1_Li	0.79372	0.3413	0.00603546	1	2.66361e-23	1.97056e-10	0.0021072
H1-hESC_RAD21_My	0.915961	0.468669	0.00968277	1	5.39758e-14	3.35041e-06	7.83004e-06
H1-hESC_RAD21_Sn	0.828216	0.290938	0.000260144	1	5.41325e-05	8.88402e-07	0.000388592
IMR90_RAD21_Sn	0.812383	0.208085	0.270843	1	0.0125878	0.0573893	0.535585
LCL_CTCF_Iy & LCL_RAD21_My	0.546591	0.259801	0.00664919	1	0.000158034	8.75571e-06	1.97031e-05
LCL_CTCF_W_Li & LCL_SMC1_Li	0.774053	0.333162	0.00309262	0.737218	1.10817e-23	2.117e-12	2.57383e-06
H1-hESC_CTCF_Be & H1-hESC_RAD21_My	0.669464	0.232026	0.00308946	1	7.27985e-06	2.65763e-06	0.000369535
H1-hESC_CTCF_My & H1-hESC_RAD21_Sn	0.423368	0.282178	0.00401107	1	5.16979e-19	6.20218e-13	0.0186212
IMR90_CTCF_Sn & IMR90_RAD21_Sn	0.812383	0.208085	0.270843	1	0.0125878	0.0573893	0.0558425
Tel Repeat	0.000290102	0.376709	0.000145563	0.789689	0.844587	7.89641e-06
